# Supplementary material
Source: bioRxiv or medRxiv preprint supplement (http://medrxiv.org/highwire/filestream/70097/field_highwire_adjunct_files/0/19011437-1.pdf)
Supplement: Supplementary file [file 19011437-1.pdf]

**Identification of non-small cell lung cancer subgroups with distinct  
immuno-therapy outcomes from integrating genomics and electronic  
health records on a graph convolutional network**

- I. Supplemental Figures
- II. Supplemental Tables
- III. Supplemental Methods

### KRAS Genomic Alterations in Overall Cohort

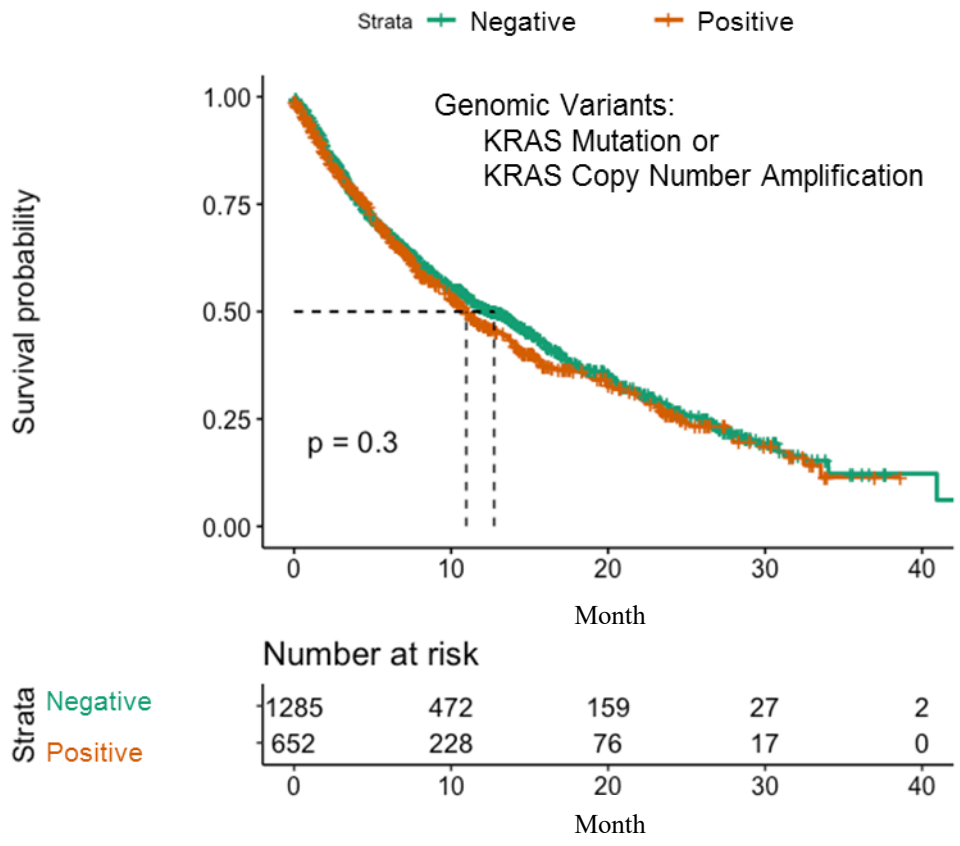

(a)

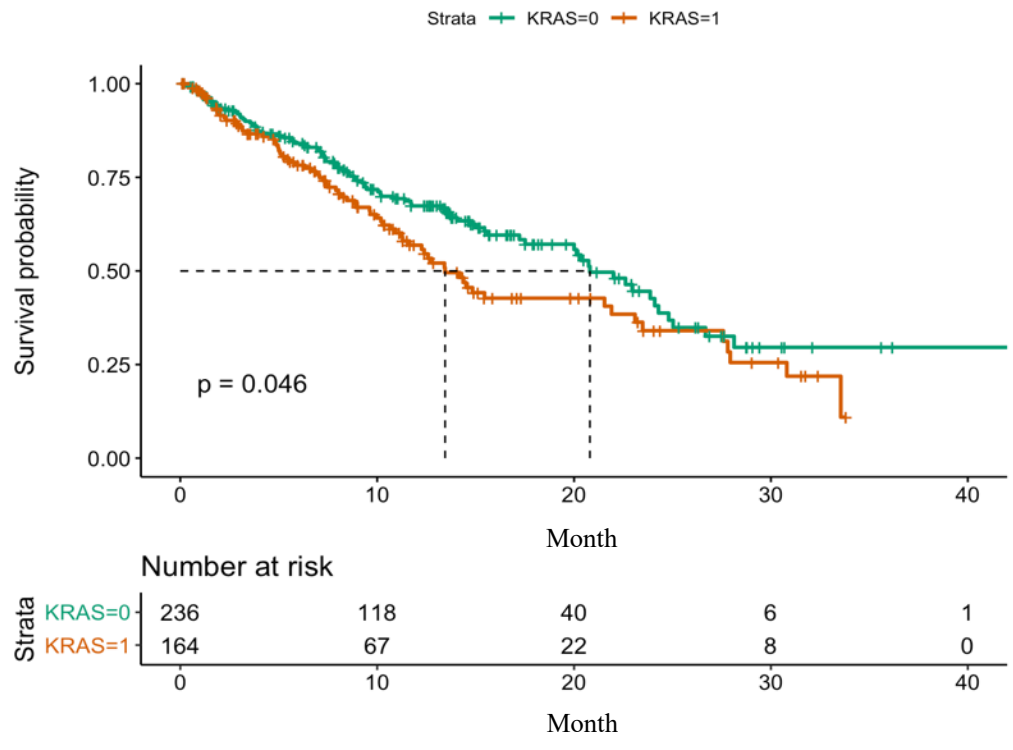

(b)

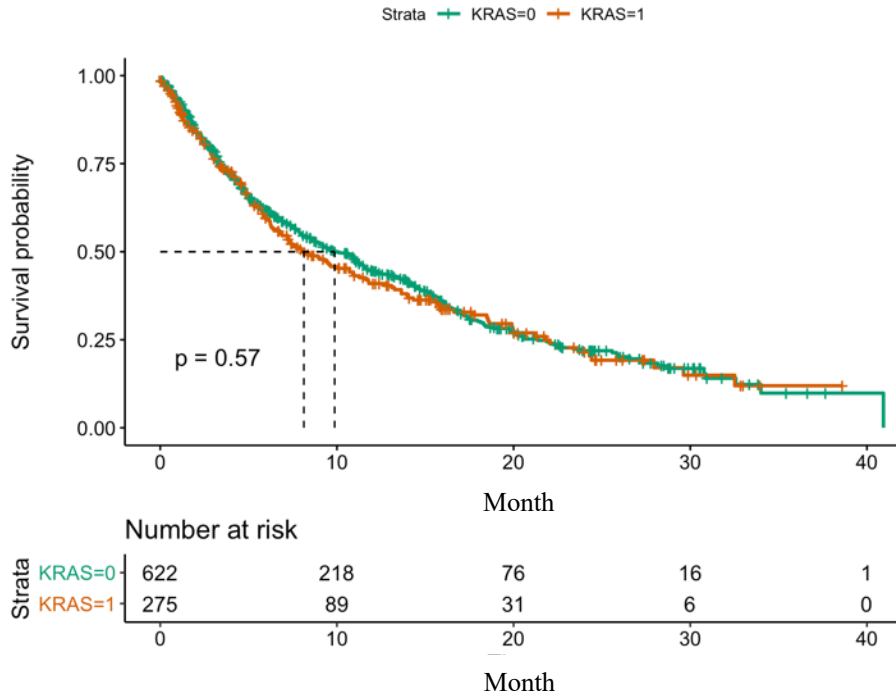

(c)

**Supplemental Figure 1** a) IO cohort survival does not show any significant difference whether a patient contains KRAS gene alteration or not. b) In responsive subgroup, patients without KRAS gene alteration have better survival. c) In non-responsive subgroup, the patient survival is not significantly affected by KRAS mutation.

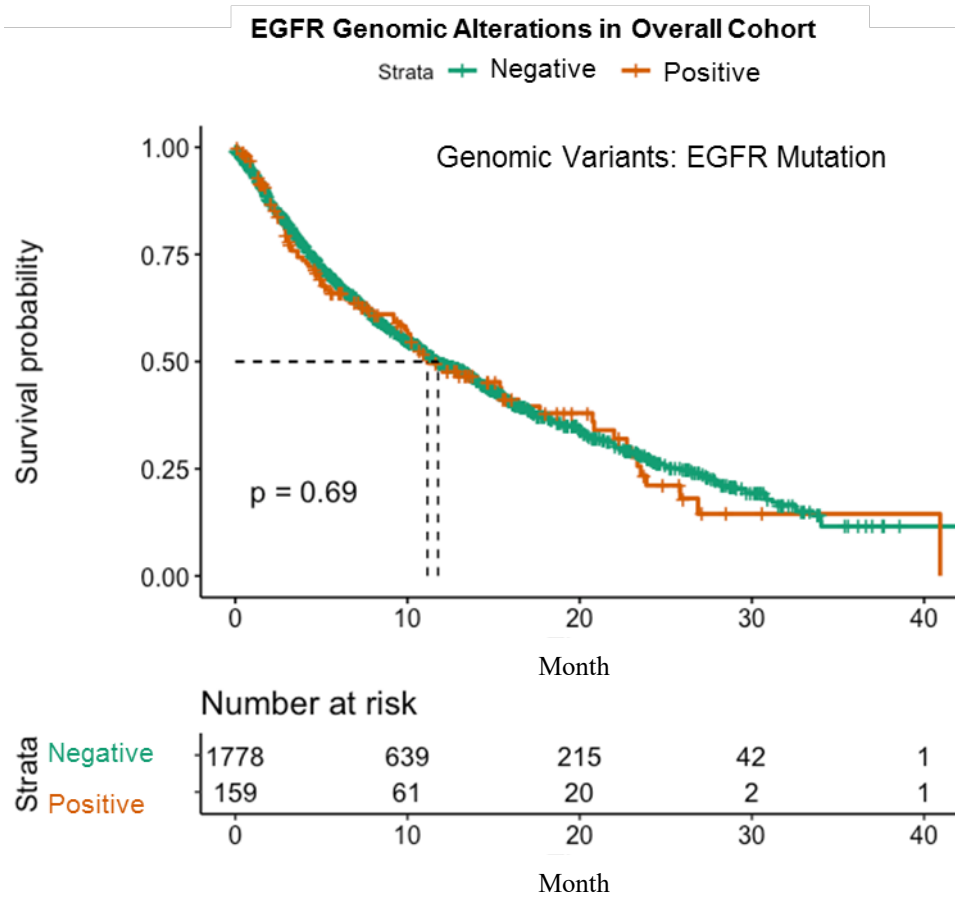

**Supplemental Figure 2.** Relation between EGFR mutation and overall survival after IO treatment in the overall IO cohort.

### BRAF Genomic Alterations in Overall Cohort

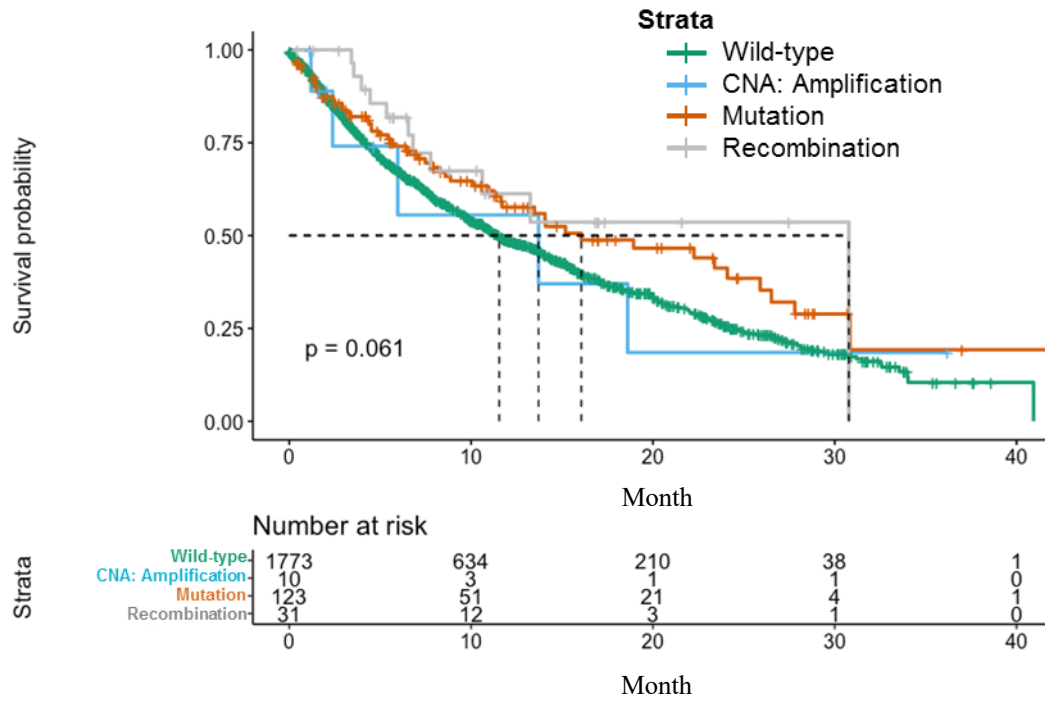

**Supplemental Figure 3.** Relation between BRAF genomic alterations and overall survival after IO treatment in the overall IO cohort.

| Gene    | Mutation | Amplification | Deletion |
|---------|----------|---------------|----------|
| KRAS    | R        | R             |          |
| EGFR    | R        |               |          |
| MCL1    | R        | R             |          |
| NFKBIA  |          | R             |          |
| CCNE1   |          | R             |          |
| CDKN2A  |          | R             |          |
| BRAF    | R        | R             |          |
| CDKN2B  | R        |               |          |
| RB1     |          |               | R        |
| MYC     |          | R             |          |
| RBM10   | R        |               |          |
| NF1     | R        |               | N        |
| ERBB2   | R        | N             |          |
| FGFR1   | R        | N             |          |
| MET     | N        | R             |          |
| SMARCA4 | N        |               | R        |
| PTEN    | N        |               | R        |
| STK11   |          |               | N        |
| FGF12   |          | N             |          |
| TP53    |          |               | N        |
| SPTA1   | N        |               |          |
| KEAP1   | N        |               | N        |
| TERT    | N        |               |          |
| NFE2L2  | N        |               |          |
| PIK3CA  |          | N             |          |

**Supplemental Table 1:** Enriched genomics characteristics differentiating the responsive and nonresponsive groups.

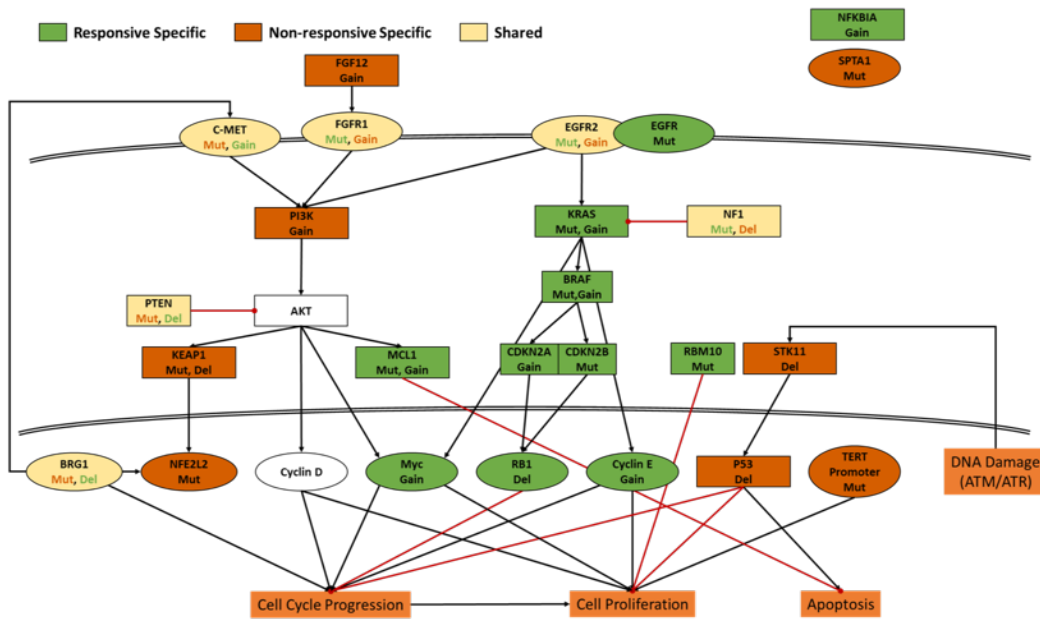

**Supplemental Figure 4:** The inferred underlying signaling pathways derived from the landscapes of the genetic alterations in responsive and non-responsive subgroups.
